# Supplementary material for: Li2S/carbon nanocomposite strips from a low-temperature conversion of Li2SO4 as high-performance lithium–sulfur cathodes
Source: Royal Society of Chemistry journal article supplement (doi:10.1039/c8ta00515j), 2018-01-01
Supplement: c8ta00515j1.pdf [file c8ta00515j1.pdf]

**Supplementary information for**

**Li<sub>2</sub>S/Carbon Nanocomposite Strips from a Low-Temperature Conversion of  
Li<sub>2</sub>SO<sub>4</sub> as High-Performance Lithium-Sulfur Cathodes**

*Fangmin Ye, Hyungjun Noh, Jinhong Lee, Hongkyung Lee, and Hee-Tak Kim \**

**Table S1.** Comparison of the Li<sub>2</sub>S electrodes derived from the conversion of Li<sub>2</sub>SO<sub>4</sub>.

| Cathode                 | Conversion Temperature (°C) | Electrode Preparation and Li <sub>2</sub> S content in the cathode electrode | Potential window for initial cycle | Initial discharge capacity | Cycle capacity (mAh/g)    | Ref.      |
|-------------------------|-----------------------------|------------------------------------------------------------------------------|------------------------------------|----------------------------|---------------------------|-----------|
| Li <sub>2</sub> S@C     | 900                         | Al-current collector<br>49.6 wt.%                                            | 1.5~3 V                            | 0.5 C,<br>330              | 280 after 40<br>at 0.5 C  | 1         |
| Li <sub>2</sub> S-C     | 820                         | Al-current collector<br>68 wt.%                                              | 1.8~3.4 V                          | 0.1 C,<br>700              | 450 after 50<br>at 0.1 C  | 2         |
| Li <sub>2</sub> S-GANs  | 900                         | Al-current collector<br>37.3%                                                | 1.6~4 V                            | 0.05 C<br>620              | 320 after 50<br>at 0.2 C  | 3         |
| Li <sub>2</sub> S-rGO   | 900                         | Al-current collector<br>36 wt.%                                              | 1.5~4 V                            | 0.025 C<br>950             | 469 after<br>100 at 0.1 C | 4         |
| Li <sub>2</sub> S-KB    | 780                         | Al-current collector<br>60 wt%                                               | 1.5~4.4 V                          | 1/12 C<br>693              | 508 after 40<br>at 1/12 C | 5         |
| Li <sub>2</sub> S@C-CP  | 820                         | No-current collector<br>36 wt. %                                             | 1.7~3.8 V                          | 0.1 C<br>820               | 430 after<br>100 at 0.1 C | 6         |
| Li <sub>2</sub> S@C-CNT | 635                         | No-current collector<br>40 wt. %                                             | 1.9~3.2 V                          | 0.1 C,<br>805              | 595 after<br>150 at 0.2 C | This work |

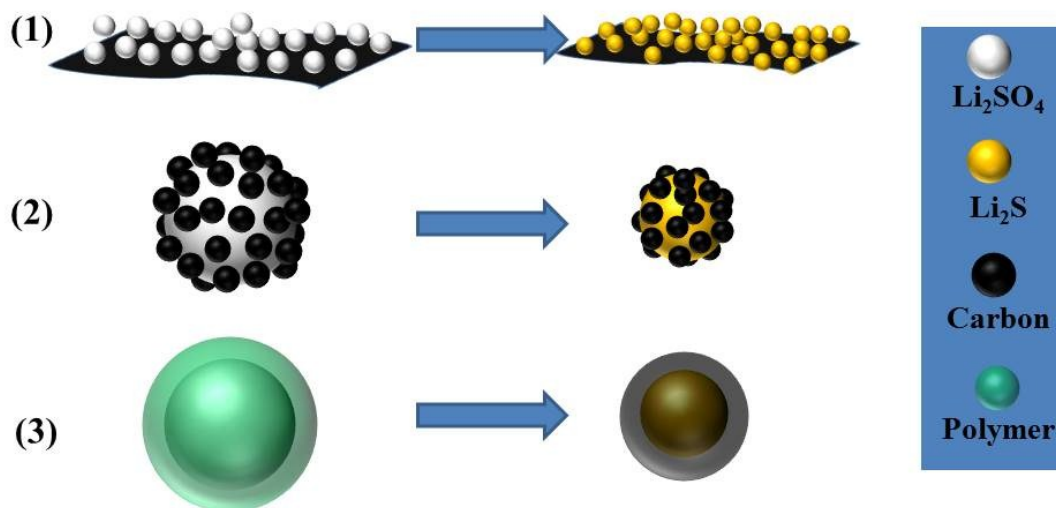

**Figure S1.** Schematic for three routes to fabricate carbon-coated  $\text{Li}_2\text{S}$  from  $\text{Li}_2\text{SO}_4$ . (1) Reduced graphene oxide (rGO) loaded  $\text{Li}_2\text{SO}_4$  to prepare the rGO- $\text{Li}_2\text{S}$  composite, (2) carbon particles coated  $\text{Li}_2\text{SO}_4$  to prepare the  $\text{Li}_2\text{S}$ -C composite, (3) polymer coated  $\text{Li}_2\text{SO}_4$  to prepare the  $\text{Li}_2\text{S}$ -C composite.

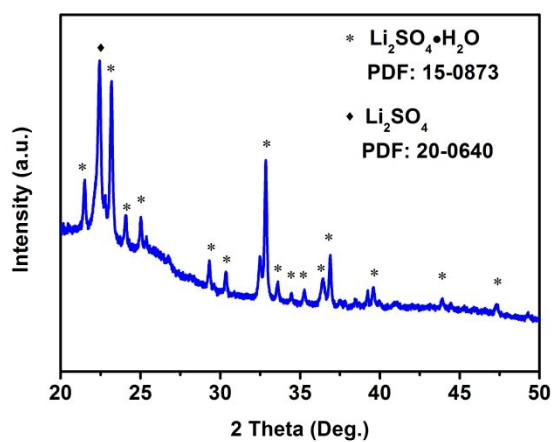

**Figure S2.** XRD pattern for the as-prepared  $\text{Li}_2\text{SO}_4$ @PVA-CNT nanocomposites.

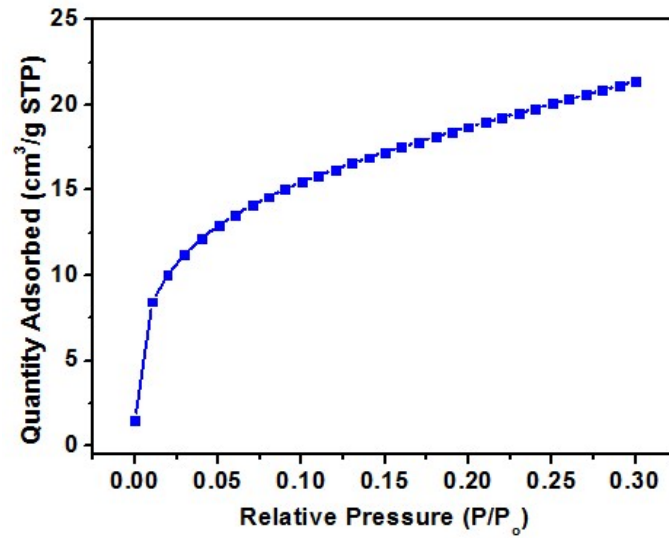

**Figure S3.** The isotherm adsorption curve for the as-prepared Li<sub>2</sub>SO<sub>4</sub>@PVA-CNT electrode.

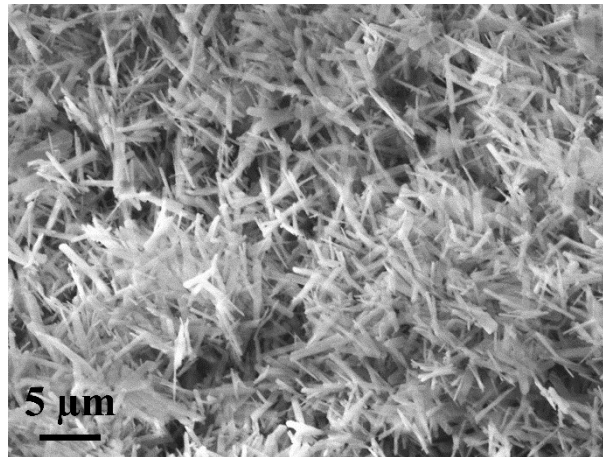

**Figure S4.** A low magnified SEM image of the as-prepared pure Li<sub>2</sub>SO<sub>4</sub> microstrips without PVA and CNT prepared by adding the PVA-free Li<sub>2</sub>SO<sub>4</sub> aqueous solution into icy ethanol.

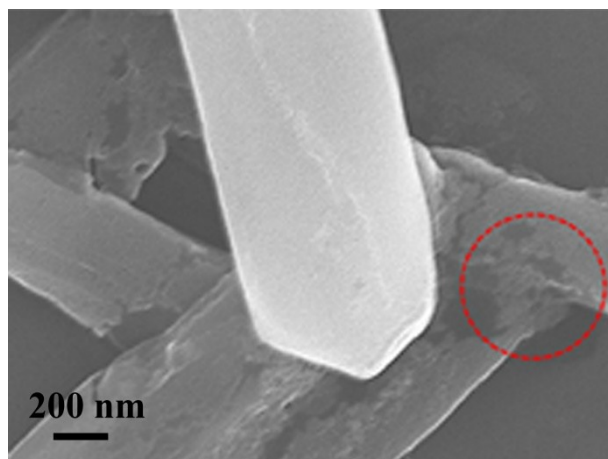

**Figure S5.** A high magnified SEM image of the pure Li<sub>2</sub>SO<sub>4</sub> microstrips without PVA and CNT prepared by adding the PVA-free Li<sub>2</sub>SO<sub>4</sub> aqueous solution into icy ethanol.

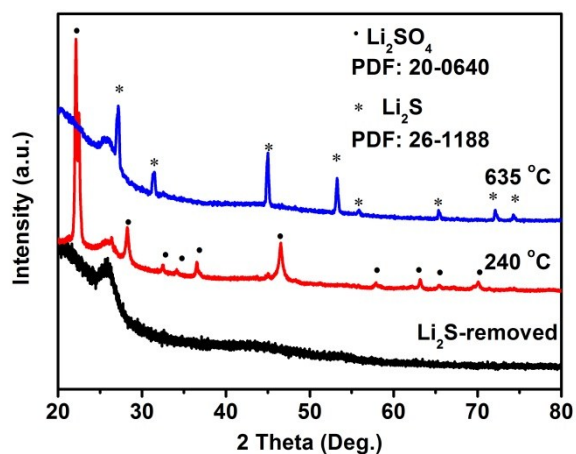

**Figure S6.** XRD patterns of the samples taken after partial carbonization at 240 °C and after the carbothermal conversion at 635 °C, and of the Li<sub>2</sub>S removed C-CNT matrix.

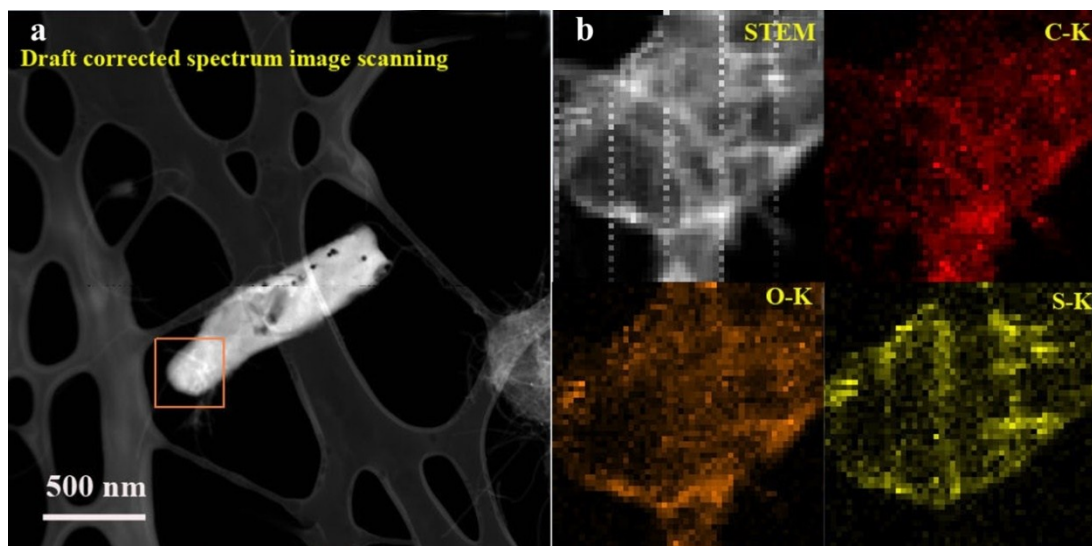

**Figure S7.** TEM image for the heat-treated  $\text{Li}_2\text{SO}_4@\text{PVA}$  nanocomposites at 240 °C (a) and the Elementary mapping of C, S and O (b).

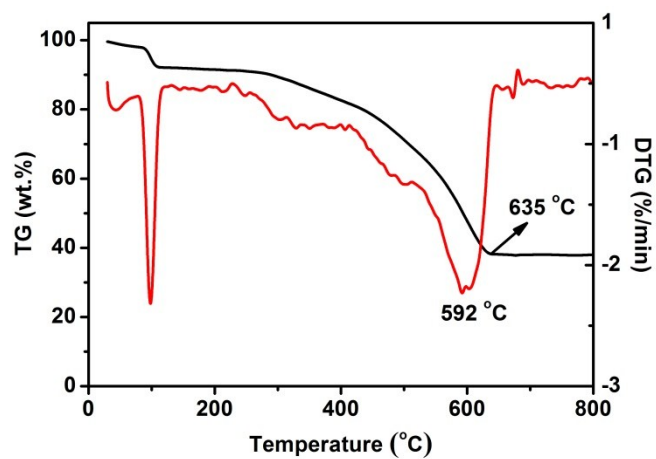

**Figure S8.** TGA curve in  $\text{N}_2$  environment for the heat-treated  $\text{Li}_2\text{SO}_4@\text{PVA-CNT}$  nanocomposites electrode at 240 °C.

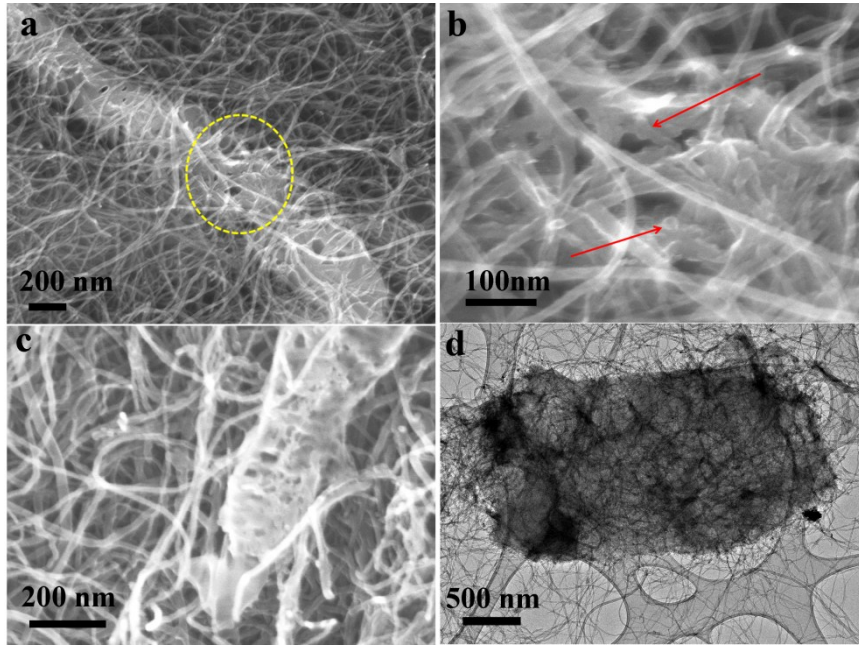

**Figure S9.** (a) SEM and (b) a high magnification SEM images for  $\text{Li}_2\text{S}@\text{C-CNT}$  electrode. (c) SEM and (d) TEM image for  $\text{Li}_2\text{S}$  removed C-CNT matrix by the  $\text{Li}_2\text{S}@\text{C-CNT}$  nanocomposite electrode dissolving into ethanol and water.

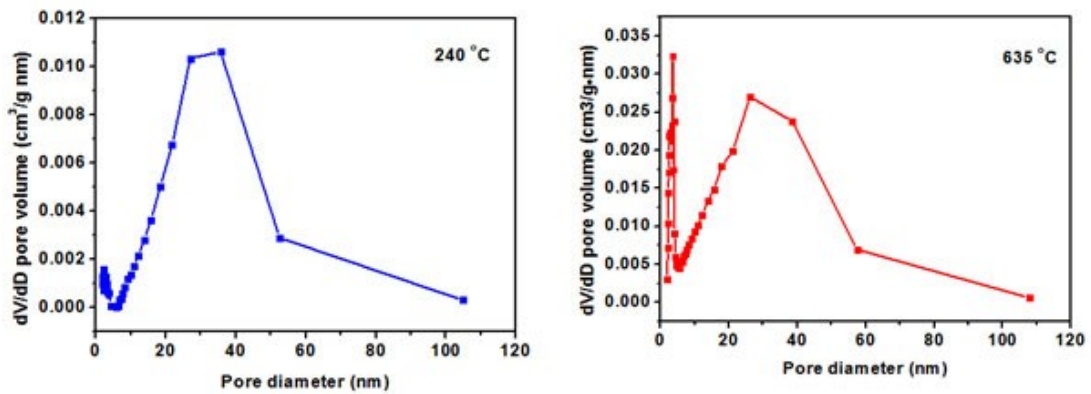

**Figure S10.** The distribution of pore size for carbon matrix before (240 °C) and after (635 °C)  $\text{Li}_2\text{S}$  formed.

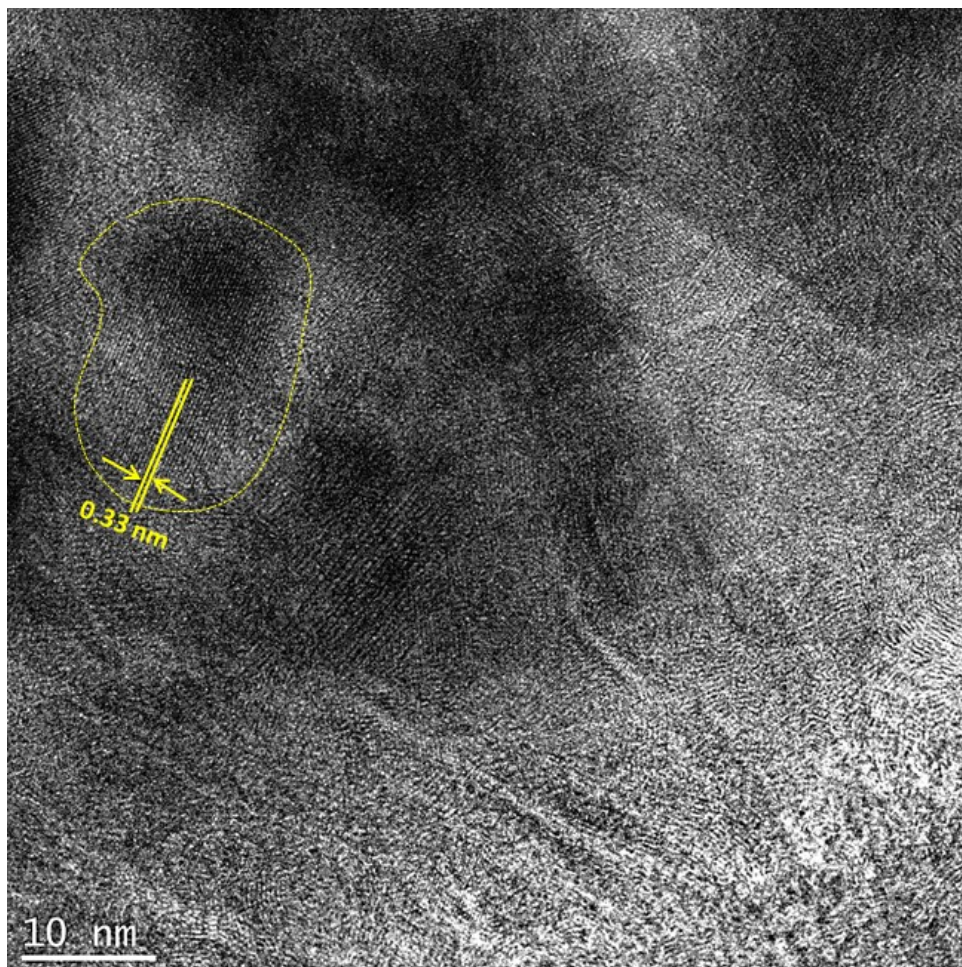

**Figure S11.** A HRTEM image for the Li<sub>2</sub>S@C composite prepared at 635°C. Li<sub>2</sub>S particle size and Li<sub>2</sub>S crystalline lattice spacing can be identified.

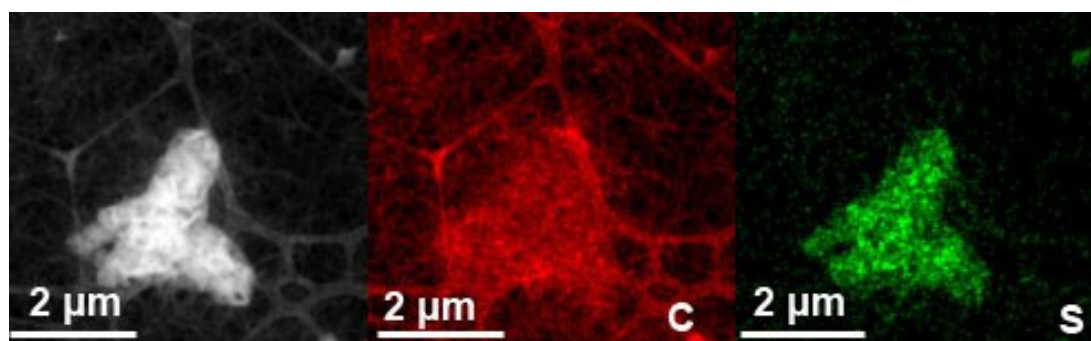

**Figure S12.** STEM image (left) for the final Li<sub>2</sub>S@C nanocomposite strips at 635 °C and the Elementary mapping of C (middle) and S (right).



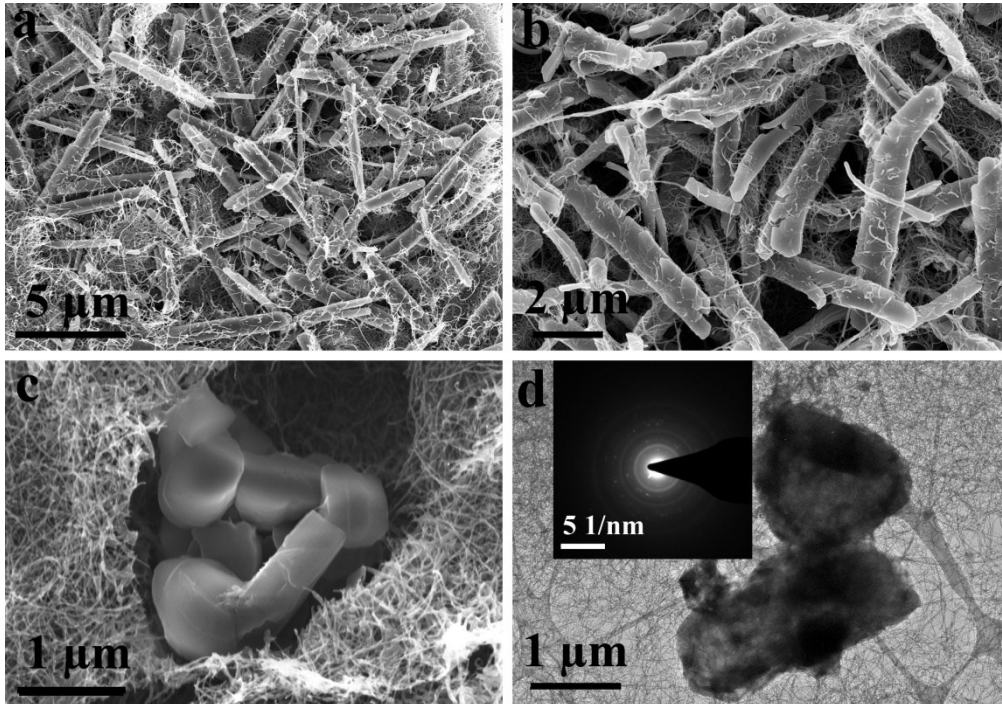

**Figure S13.** SEM image for (a) as prepared  $\text{Li}_2\text{SO}_4$ -CNT, (b) heat-treated at  $240\ ^\circ\text{C}$ , (c) heat-treated at  $700\ ^\circ\text{C}$ , and (d) TEM image for  $\text{Li}_2\text{S}$ -CNT electrode heated at  $700\ ^\circ\text{C}$  and a SAED image (inset) .

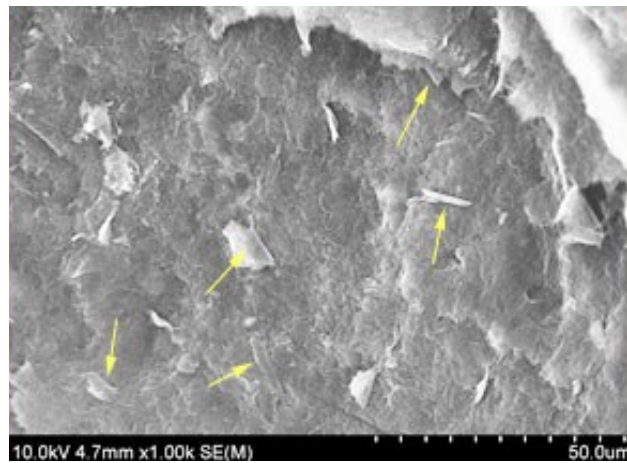

**Figure S14.** SEM image for  $\text{Li}_2\text{S}@C$ -CNT electrode over 220 cycles at a rate of  $1\ \text{C}$ .

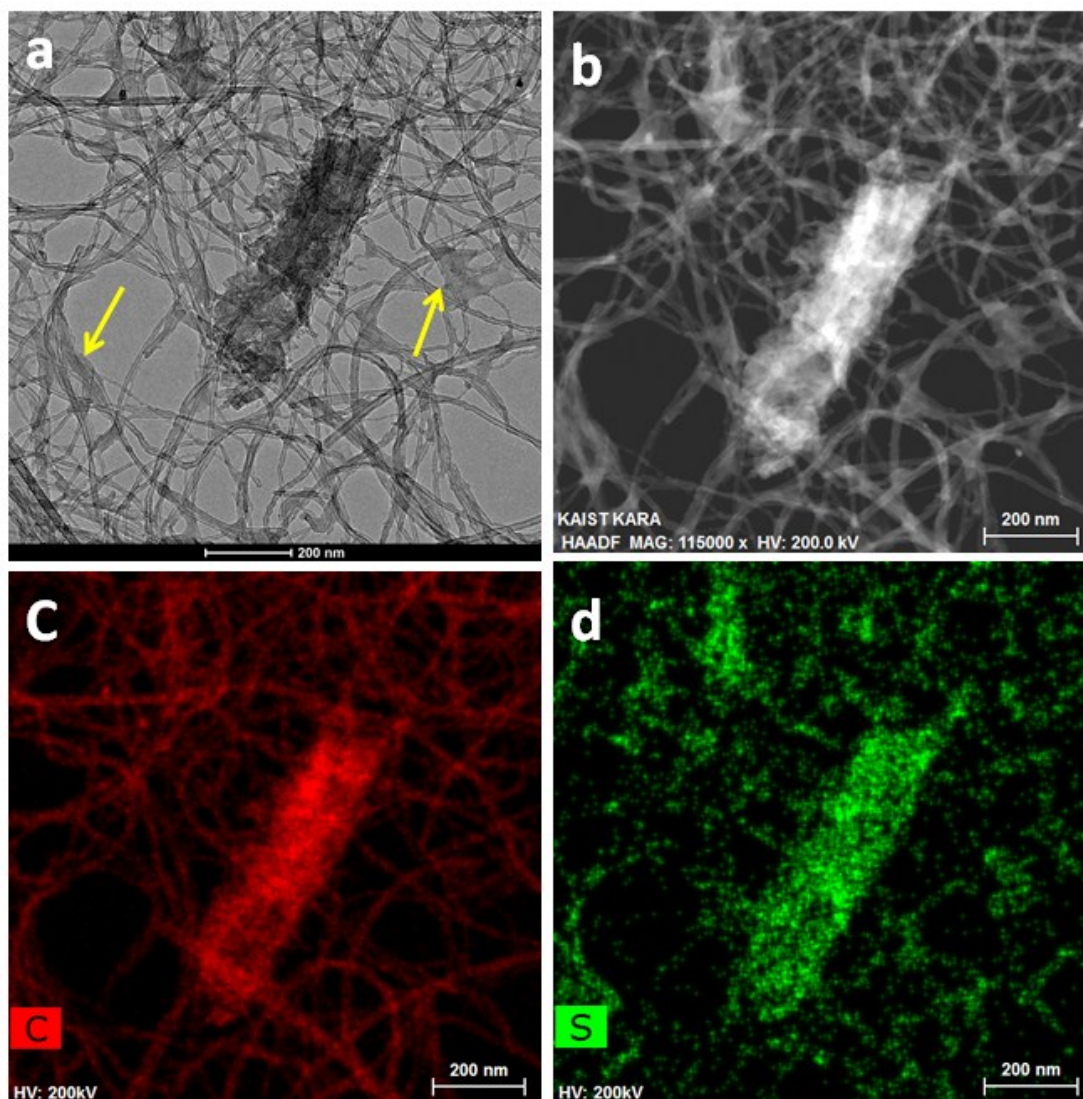

**Figure S15.** TEM (a) and STEM image (b) for the final  $\text{Li}_2\text{S}@ \text{C} - \text{CNT}$  after 220 cycles at 1 C and the elementary mapping of C (c) and S (d).

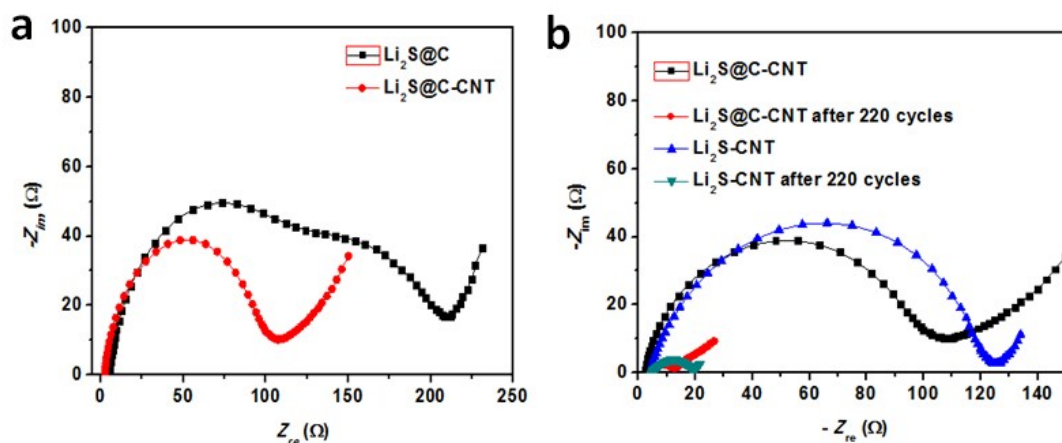

**Figure S16.** EIS spectrum (a) collected by using  $\text{Li}_2\text{S}@C$  and  $\text{Li}_2\text{S}@C\text{-CNT}$  electrode, respectively and (b) The comparison on EIS spectrum before and after cycling for  $\text{Li}_2\text{S-CNT}$  and  $\text{Li}_2\text{S}@C\text{-CNT}$  electrodes.

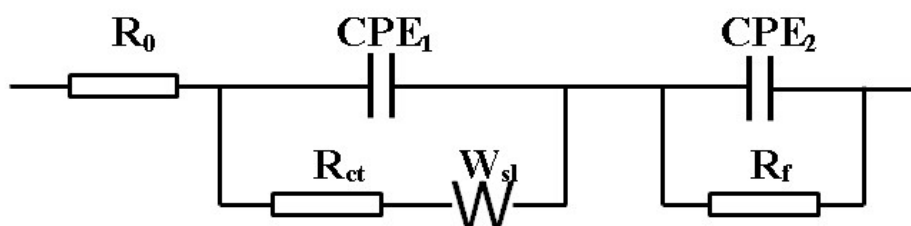

**Figure S17.** Equivalent circuit for fitting the electrochemical impedance spectra. In this equivalent circuit,  $R_0$  is the ohmic resistance of cells, including electrolyte resistance,  $R_{ct}$  is the charge transfer resistance of interface between electrode/electrolyte.  $R_f$  is the resistance induced by solid electrolyte interface (SEI) on Li metal anode,  $CPE_1$  and  $CPE_2$  are the constant phase element,  $W_{sl}$  means the Warburg impedance controlled by the semi-infinite diffusion.

**Table S2.** The impedance fitting results for the various electrodes.

|                                                          | $R_0/\Omega$ | $R_{ct}/\Omega$ | $R_f/\Omega$ |
|----------------------------------------------------------|--------------|-----------------|--------------|
| $\text{Li}_2\text{S}@C$                                  | 4.76         | 131             | 148          |
| $\text{Li}_2\text{S}@C\text{-CNT}$                       | 2.51         | 95.0            | 88.0         |
| $\text{Li}_2\text{S-CNT}$                                | 4.31         | 118             | 101          |
| $\text{Li}_2\text{S}@C\text{-CNT}$<br>(After 220 cycles) | 4.31         | 8.80            | 6.50         |
| $\text{Li}_2\text{S-CNT}$<br>(After 220 cycles)          | 4.73         | 15.1            | 10.6         |

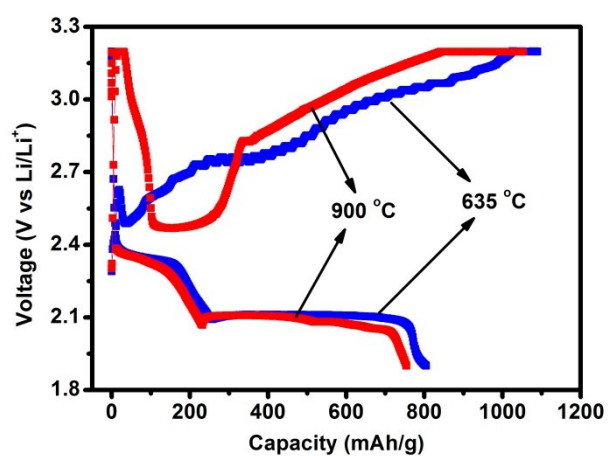

**Figure S18.** Initial charge-discharge curves for the  $\text{Li}_2\text{S}@C\text{-CNT}$  nanocomposite electrodes from two different carbothermal reaction temperatures (635 and 900 °C), respectively.

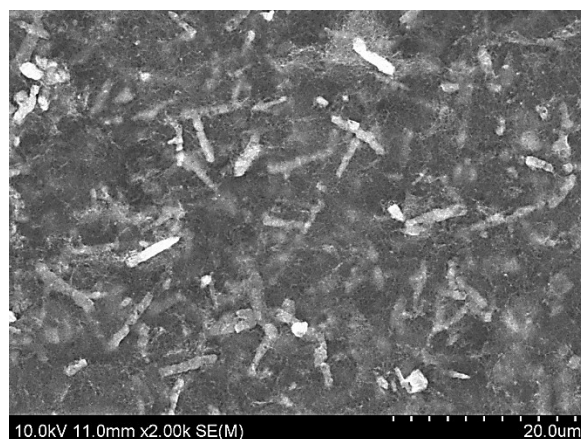

**Figure S19.** SEM image for Li<sub>2</sub>S@C-CNT electrode obtained at 900 °C in N<sub>2</sub>.

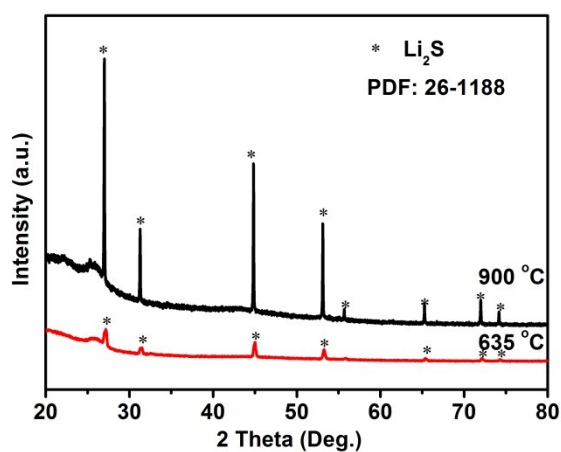

**Figure S20.** XRD patterns of the Li<sub>2</sub>S@C-CNT nanocomposite electrodes from two different carbothermal reaction temperatures of 635 and 900 °C, respectively.

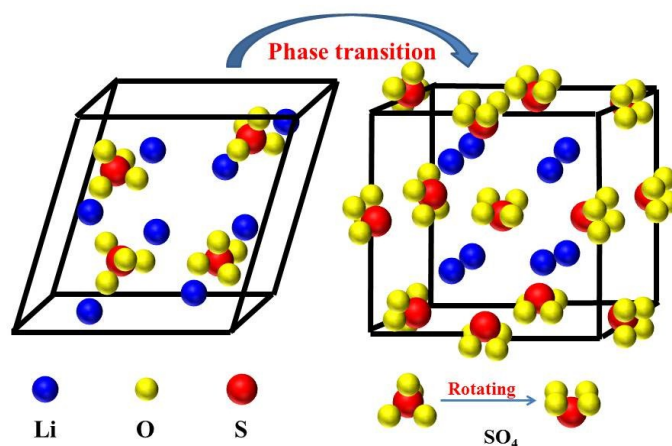

**Figure S21.** Crystal structure change for Li<sub>2</sub>SO<sub>4</sub> at 579 °C.

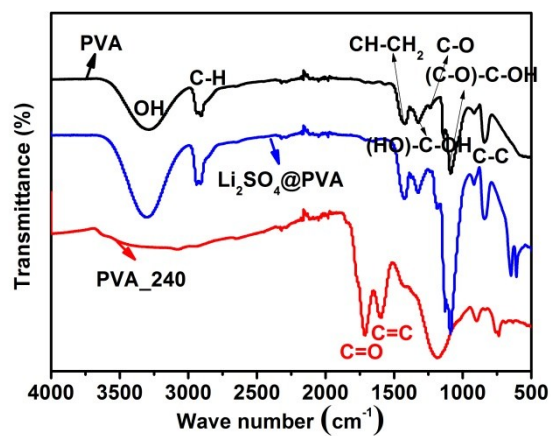

**Figure S22.** FT-IR spectrum for the pristine PVA, Li<sub>2</sub>SO<sub>4</sub>@PVA nanocomposites and PVA\_240.

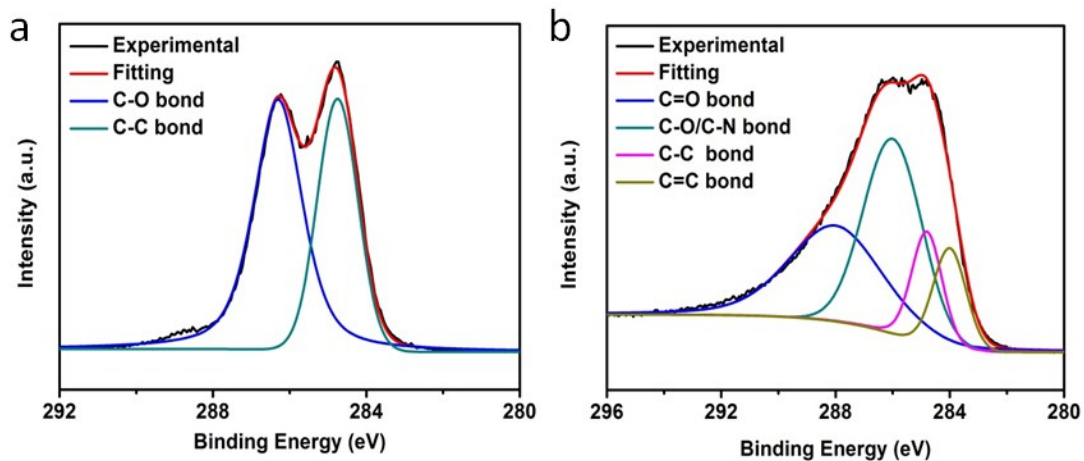

**Figure S23.** (a) C 1s XPS spectra for the pristine PVA and (b) C 1s XPS Spectra for the partial carbonized PAN in the air at 240 °C.

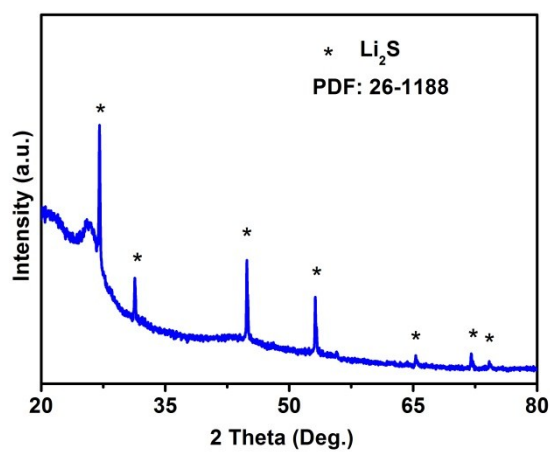

**Figure S24.** XRD pattern for  $\text{Li}_2\text{SO}_4@$ PAN composite after a heat treatment under  $\text{N}_2$  at 635 °C.

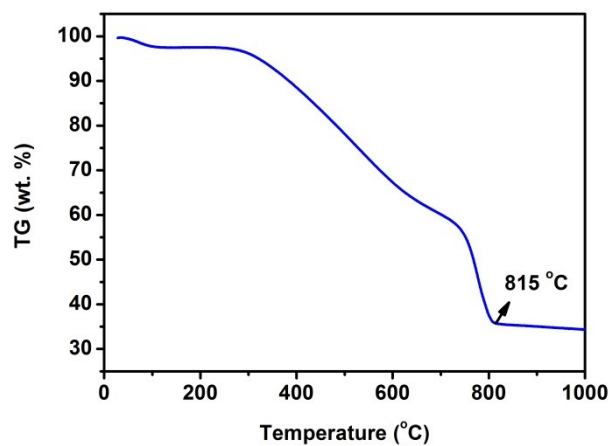

**Figure S25.** TGA curve in  $N_2$  for the heat-treated  $Li_2SO_4@RF$  nanocomposites in the air at 240 °C.

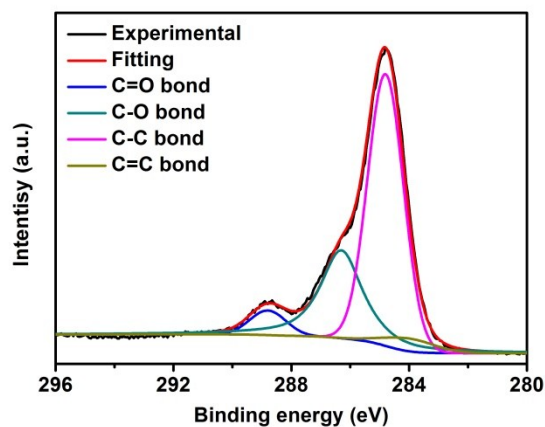

**Figure 26.** C 1s XPS Spectra for the  $Li_2SO_4@RF$  nanocomposites after a heat treatment in the air at 240 °C.



## References

- [1] Z. Yang, J. Guo, S. K. Das, Y. Yu, Z. Zhou and H. D. Abruna, L. A. Archer, *J. Mater. Chem. A* 2013, **1**, 1433-1440.
- [2] M. Kohl, J. Bruckner, I. Bauer, H. Althues and S. J Kaskel, *Mater. Chem. A* 2015, **3**, 16307-16312.
- [3] J. Liu, H. Nara, T. Yokoshima, T. Momma and T. Osaka, *Electrochim. Acta* 2015, **183**, 70-77.
- [4] D. H. Wang, X. H. Xia, D. Xie, X. Q. Niu, X. Ge, C. D. Gu, X. L. Wang and J. P. Tu, *J. Power Sources* 2015, **299**, 293-300.
- [5] Z. Li, S. Zhang, C. Zhang, K. Ueno, T. Yasuda, R. Tatara, K. Dokko and M. Watanabe, *Nanoscale* 2015, **7**, 14385-14392.
- [6] D. H. Wang, D. Xie, T. Yang, Y. Zhong, X. L. Wang, X. H. Xia, C. D. Gu and J. P. Tu, *J. Power Sources* 2016, **331**, 475-480.
